# Supplementary material for: Methylation of RNA polymerase II non-consensus Lysine residues marks early transcription in mammalian cells
Source: eLife journal article supplement (doi:10.7554/elife.11215), 2015-12-19

Fig. 7 - figure supplement 1

a

Correlation of K7me/K7ac ratios and RNAPII CTD modifications

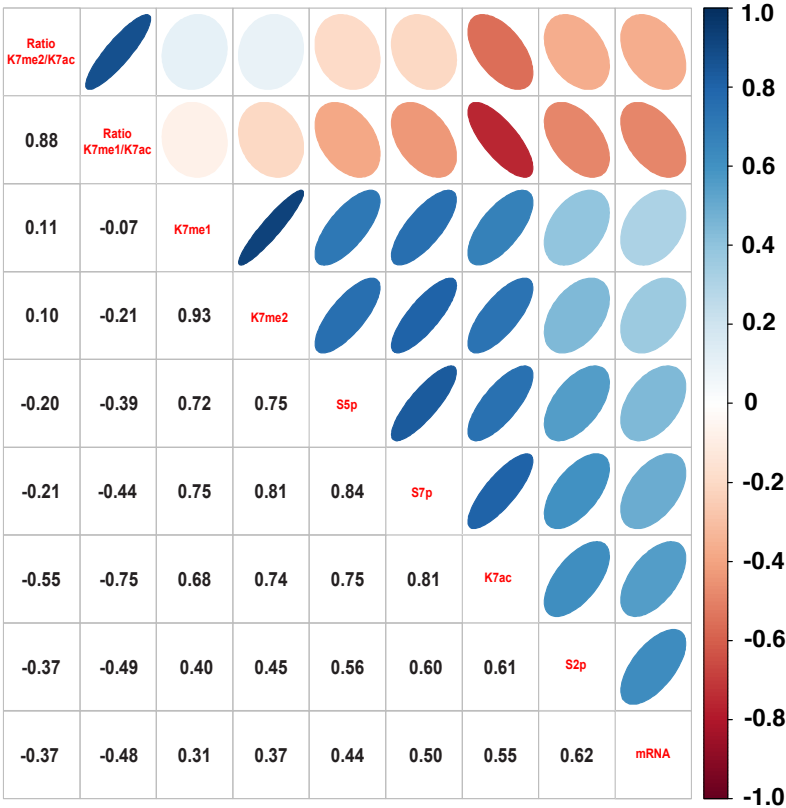

Increasing correlation with mRNA

b

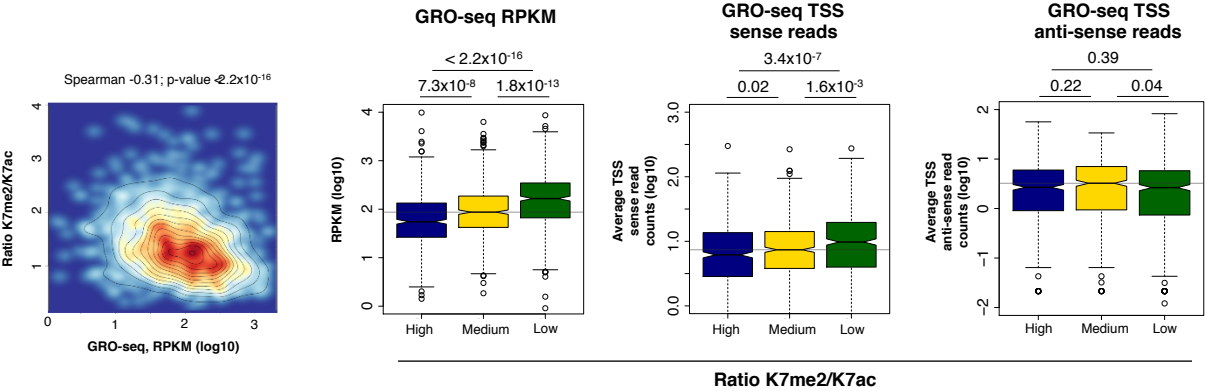

Supplement: supp [file elife-11215-supp-v1.zip]
