# Supplementary figures and images for: Methylation of RNA polymerase II non-consensus Lysine residues marks early transcription in mammalian cells
Source: eLife journal article supplement (doi:10.7554/elife.11215), 2015-12-19

**Fig. 7 - figure supplement 3**

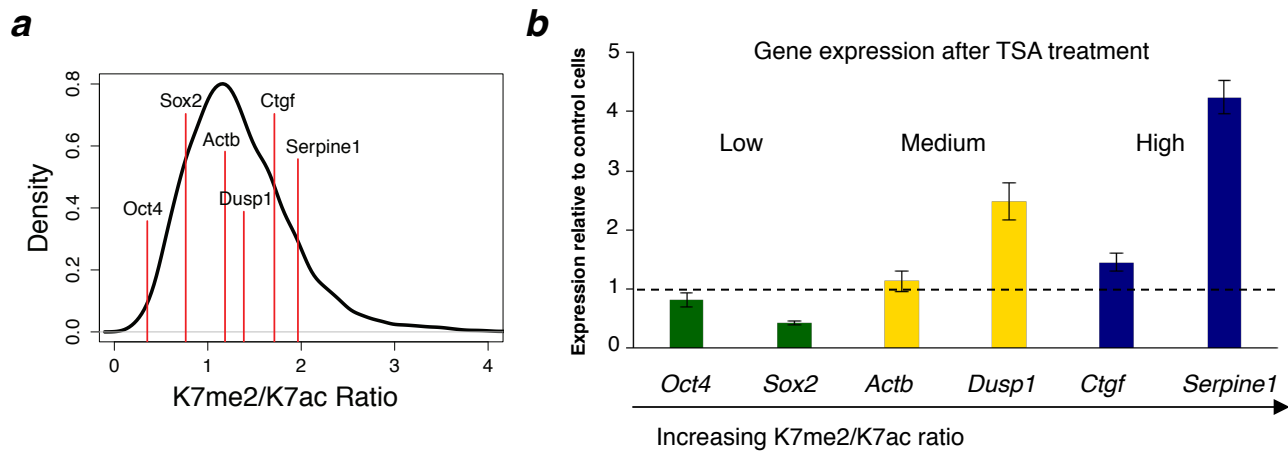

Supplement: supp [file elife-11215-supp-v1.zip]

Fig. 4 - figure supplement 1

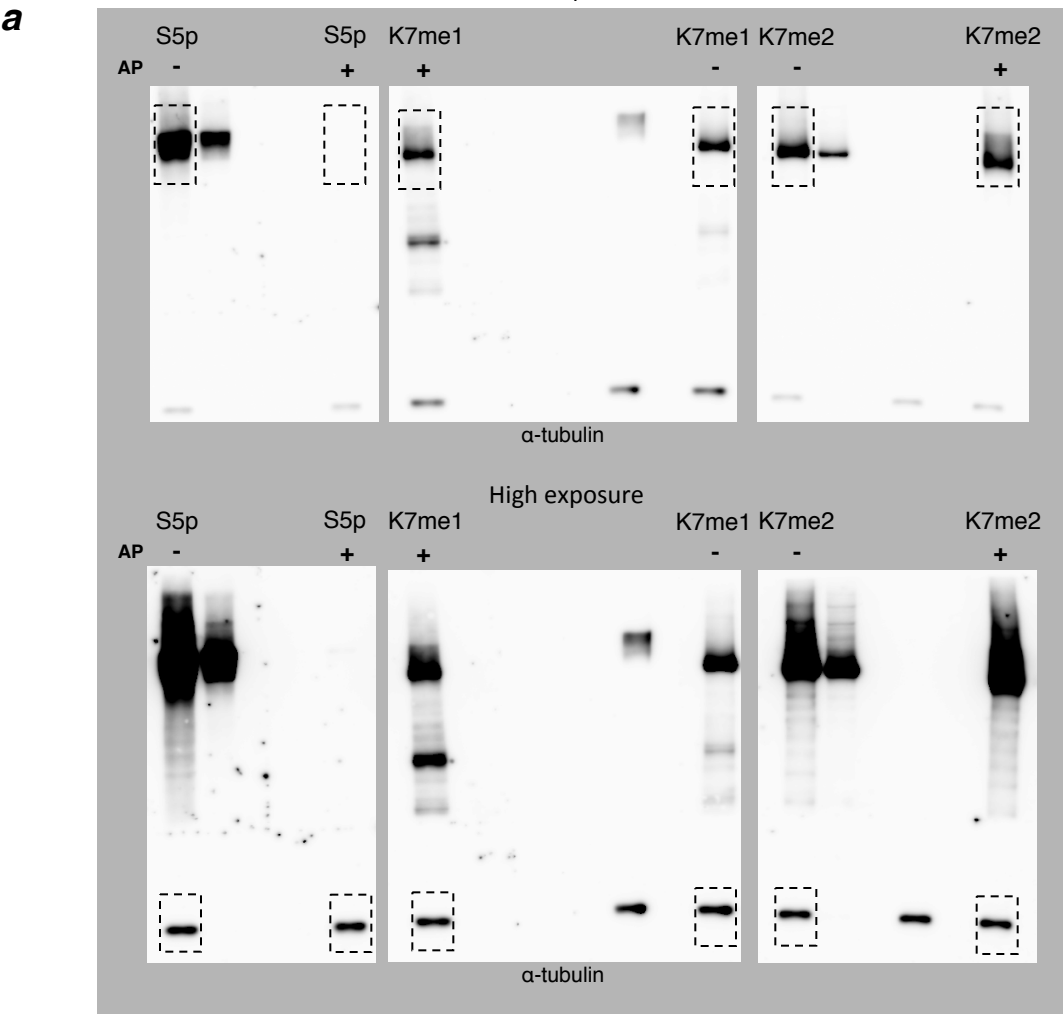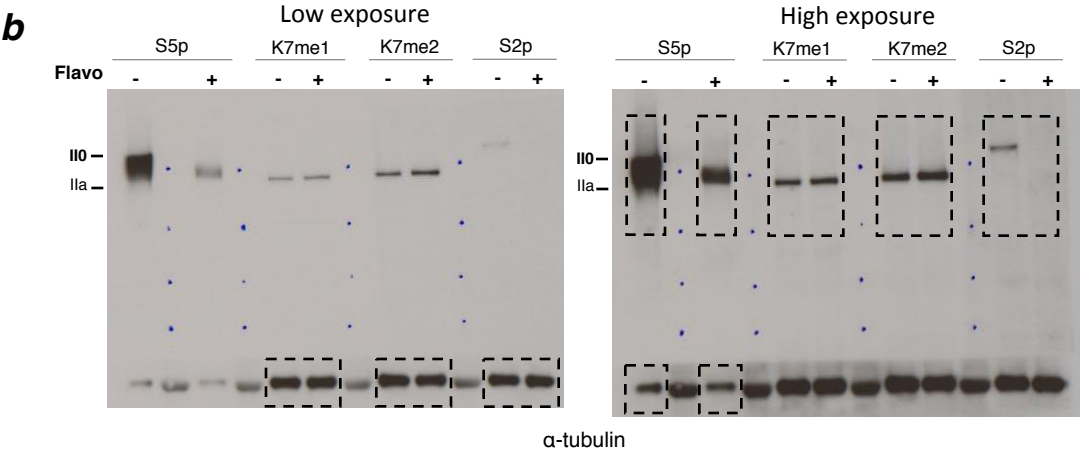

Supplement: supp [file elife-11215-supp-v1.zip]

Fig. 3 - figure supplement 1

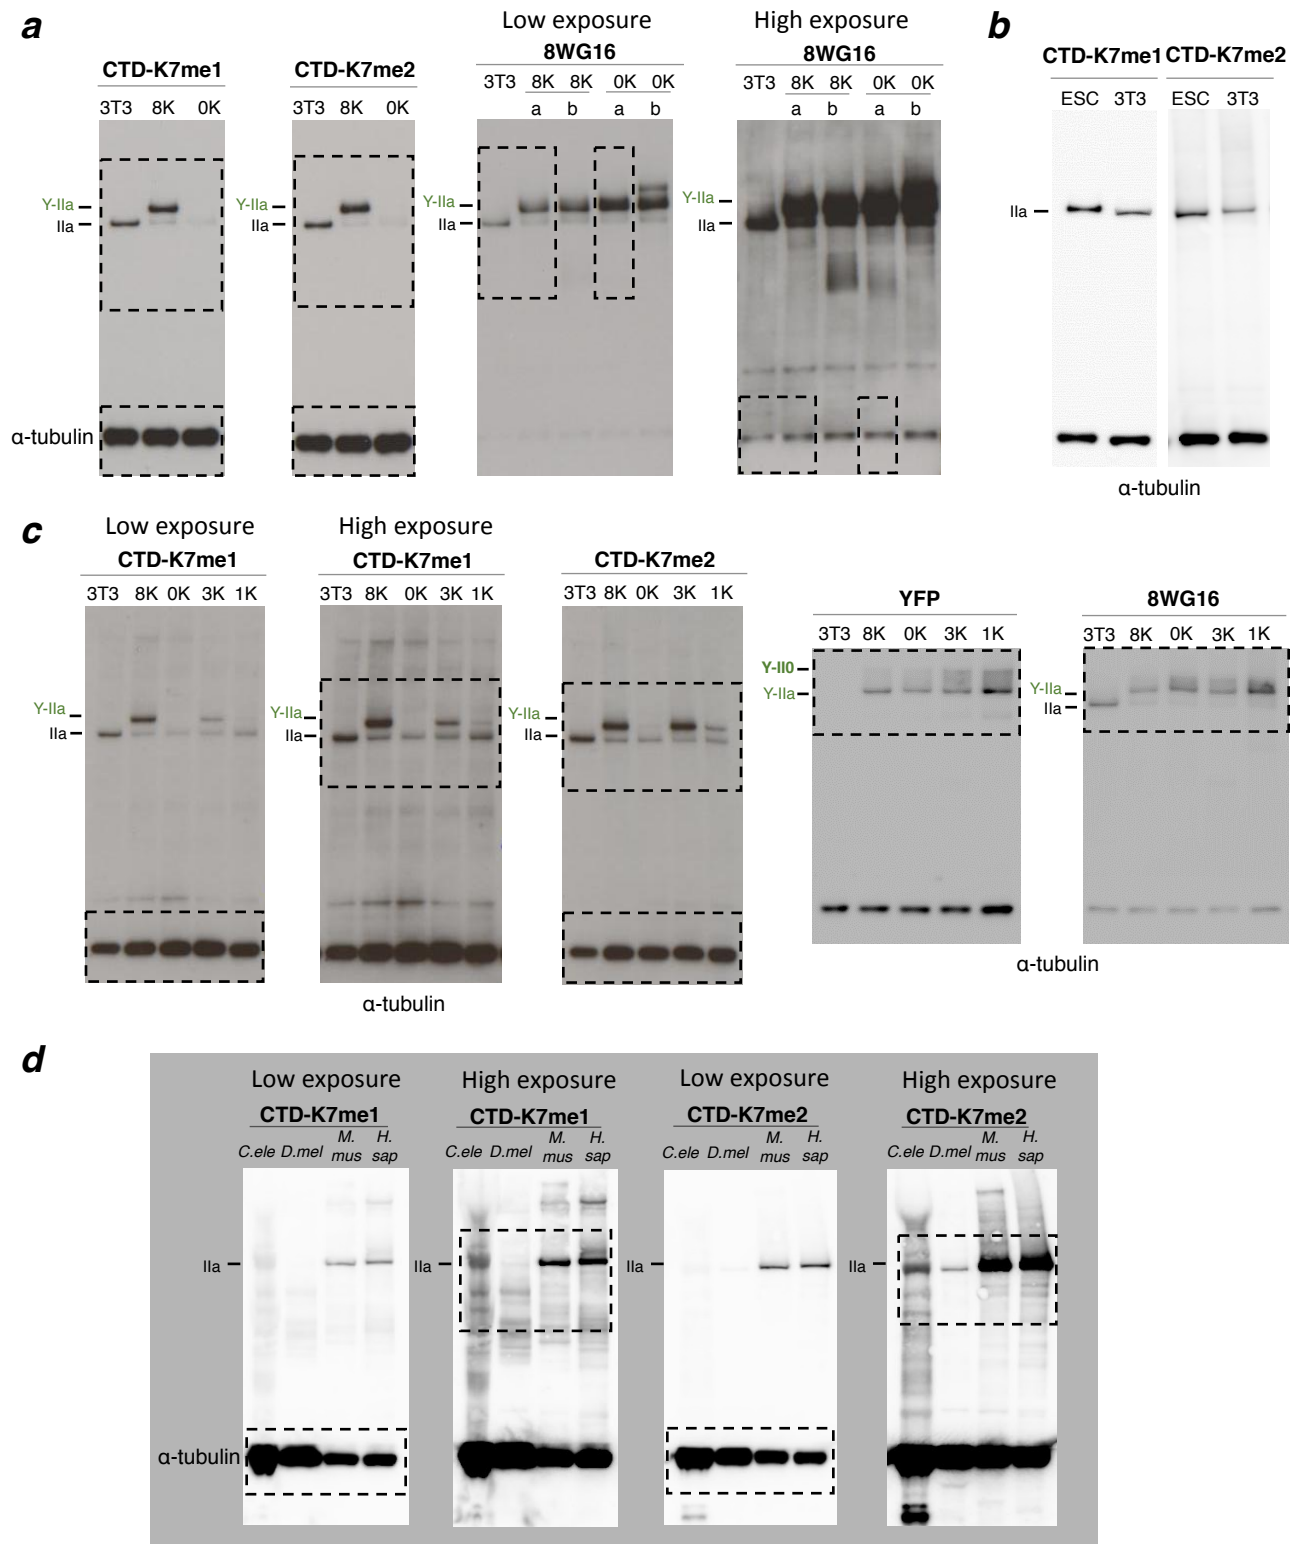

Supplement: supp [file elife-11215-supp-v1.zip]

Fig. 6 - figure supplement 2

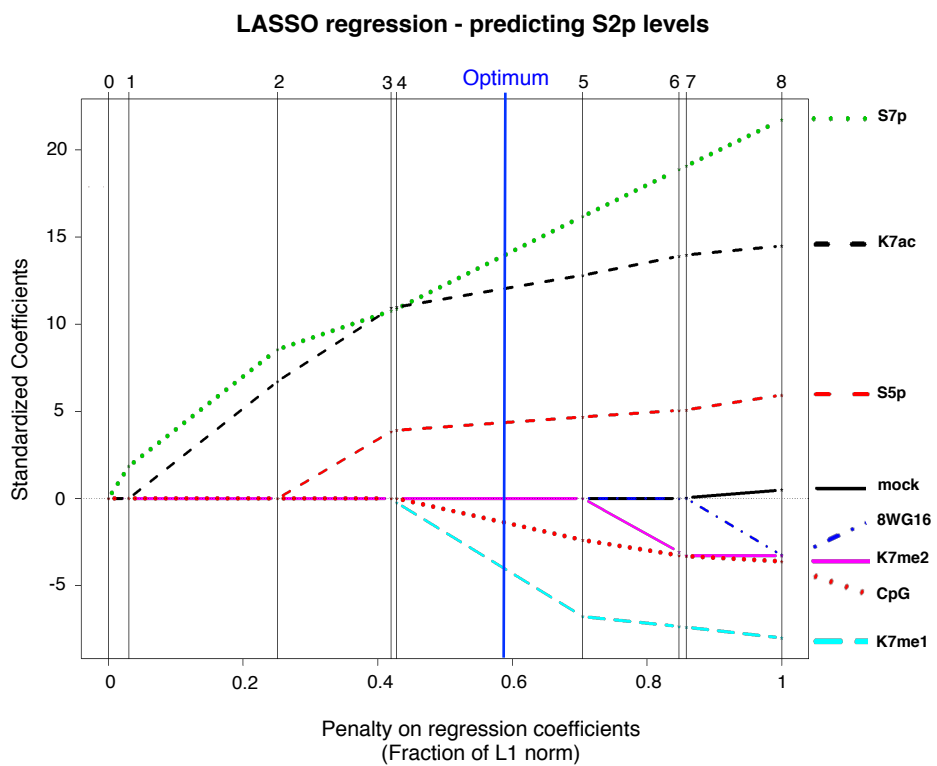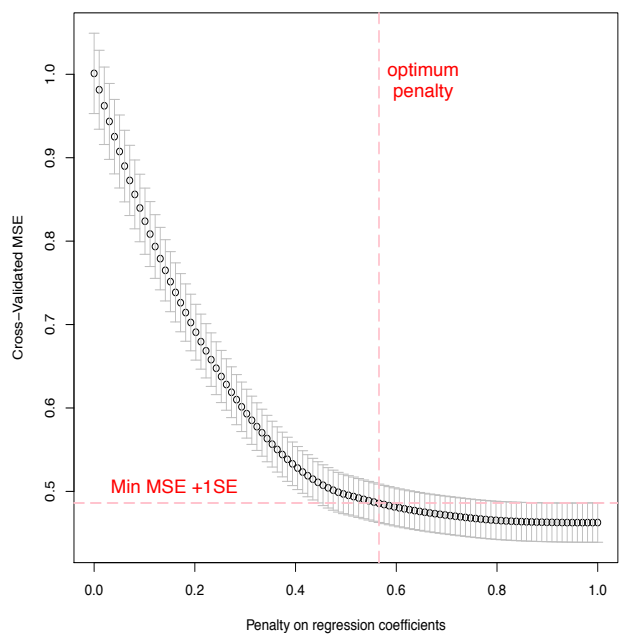

Supplement: supp [file elife-11215-supp-v1.zip]

Fig. 5 - figure supplement 2

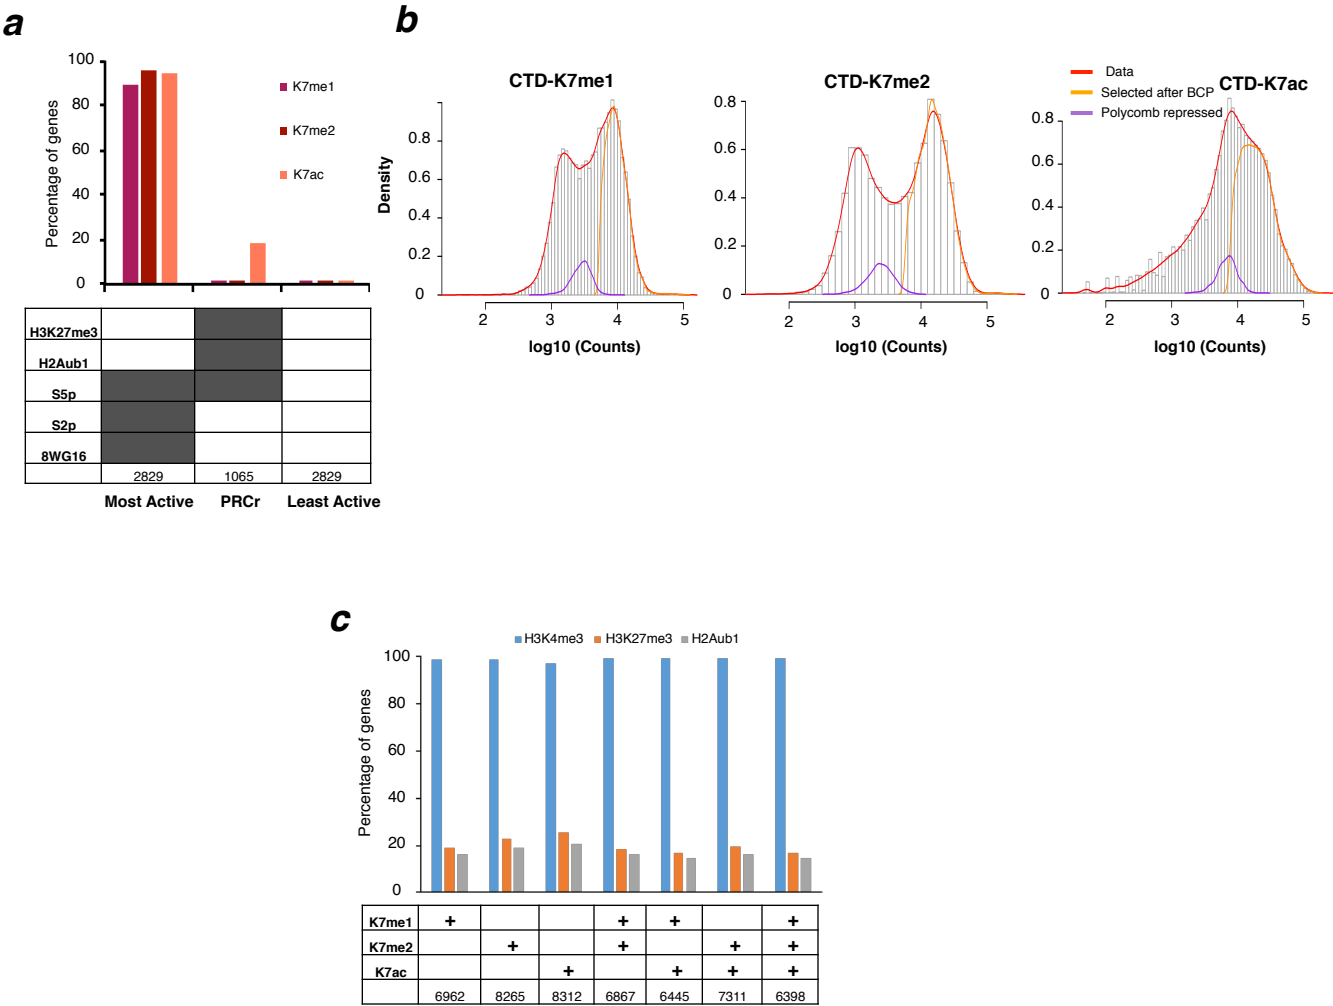

Supplement: supp [file elife-11215-supp-v1.zip]

Fig. 2 - figure supplement 1

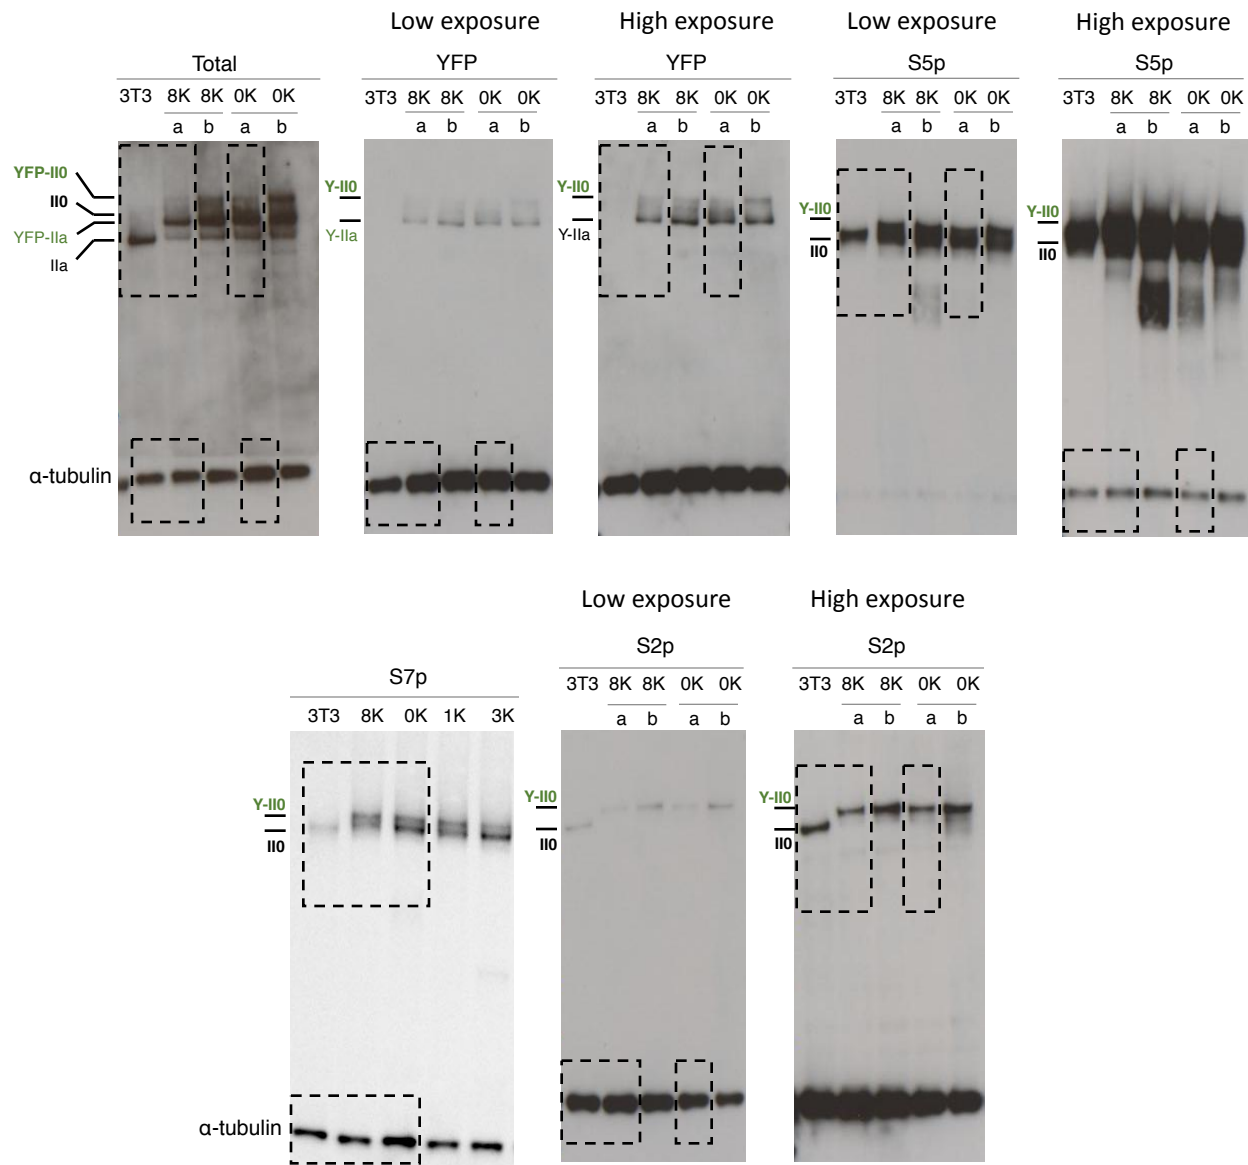

Supplement: supp [file elife-11215-supp-v1.zip]

**Fig. 7 - figure supplement 4**

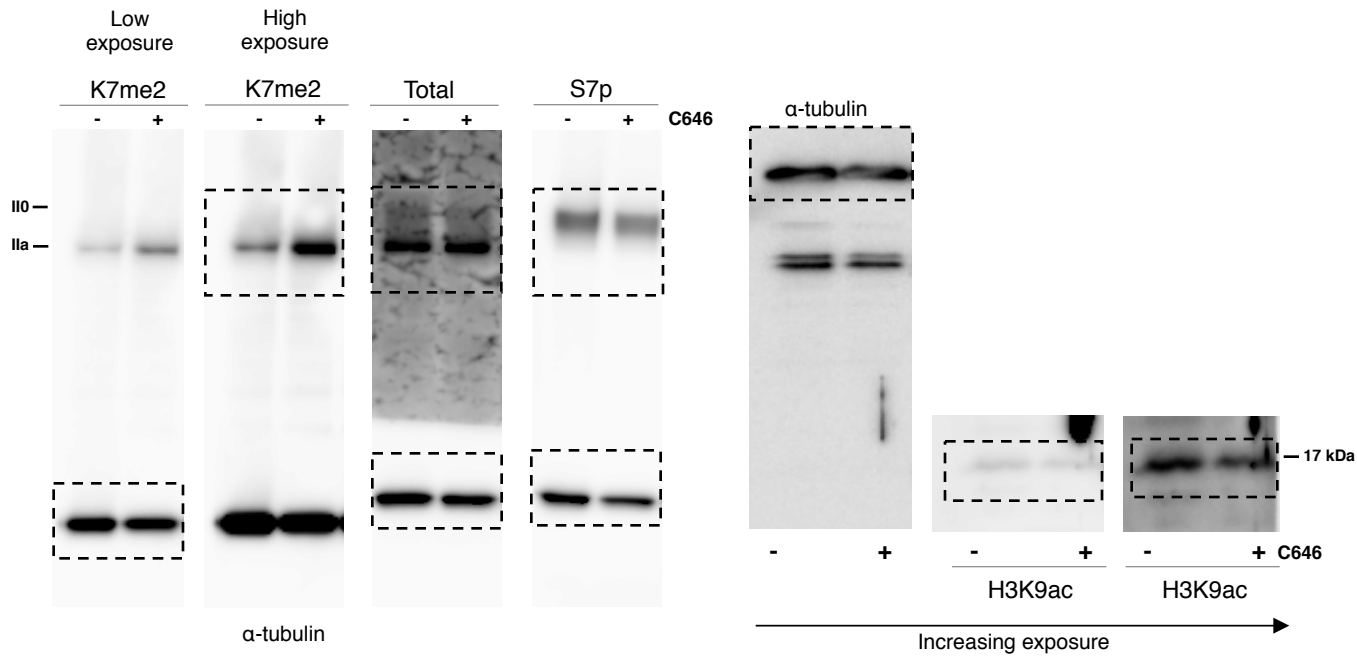

Supplement: supp [file elife-11215-supp-v1.zip]

Fig. 5 - figure supplement 1

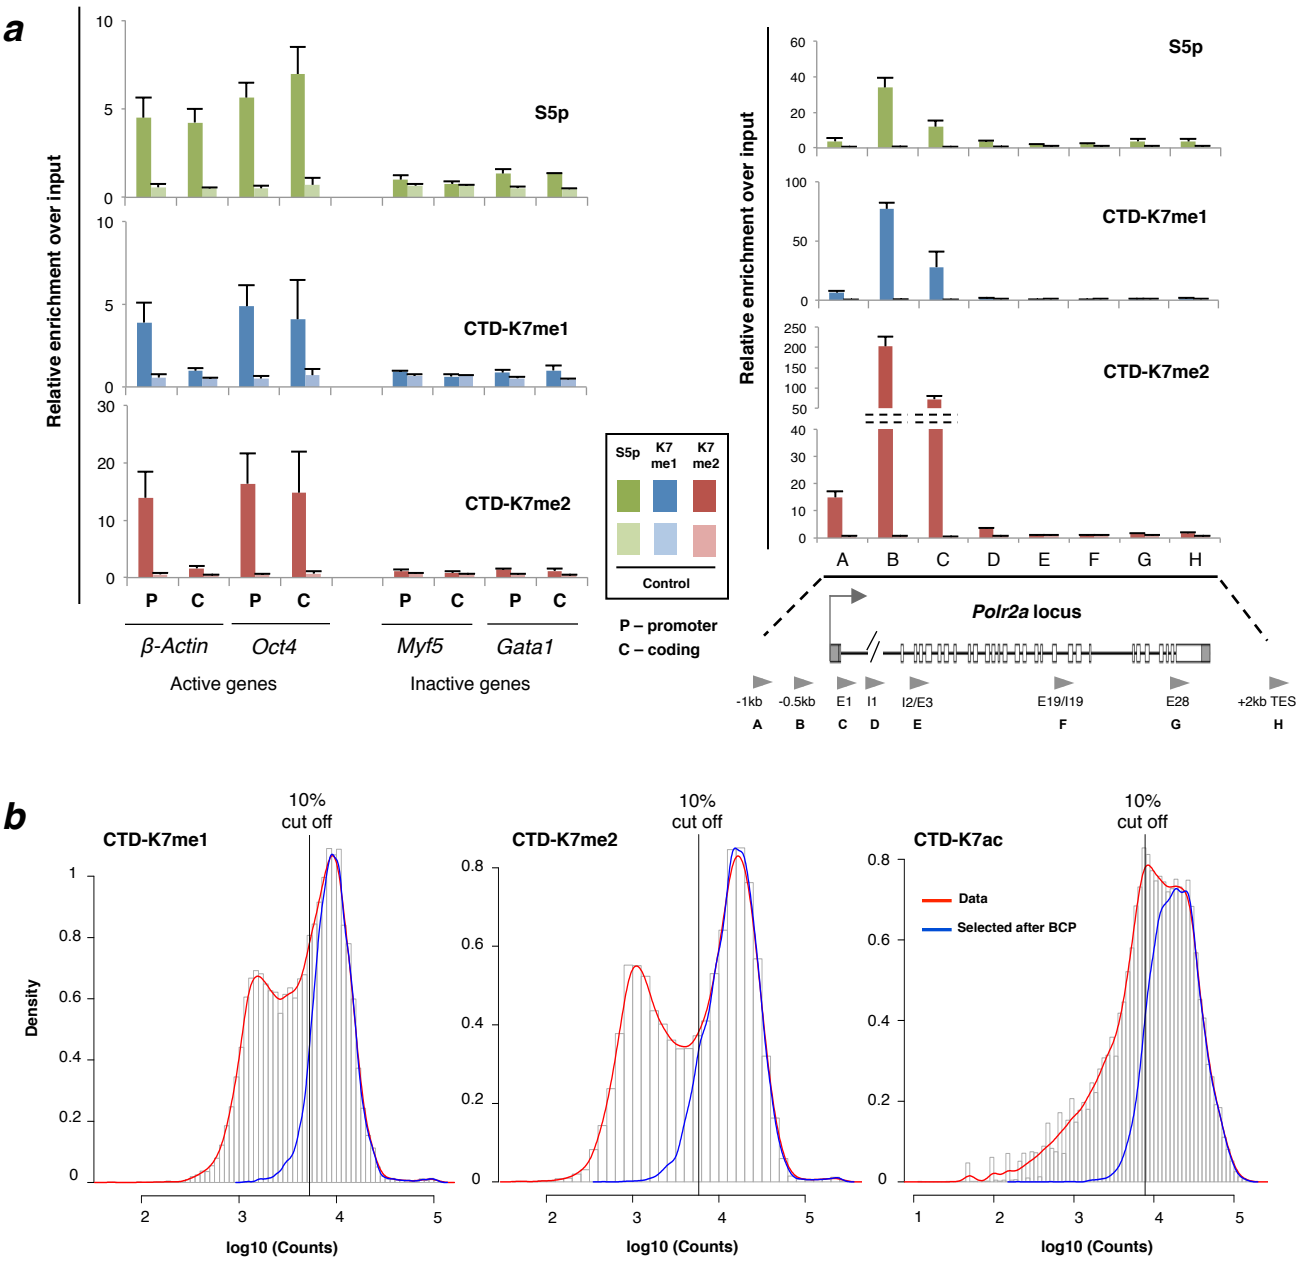

Supplement: supp [file elife-11215-supp-v1.zip]

Fig. 7 - figure supplement 2

a

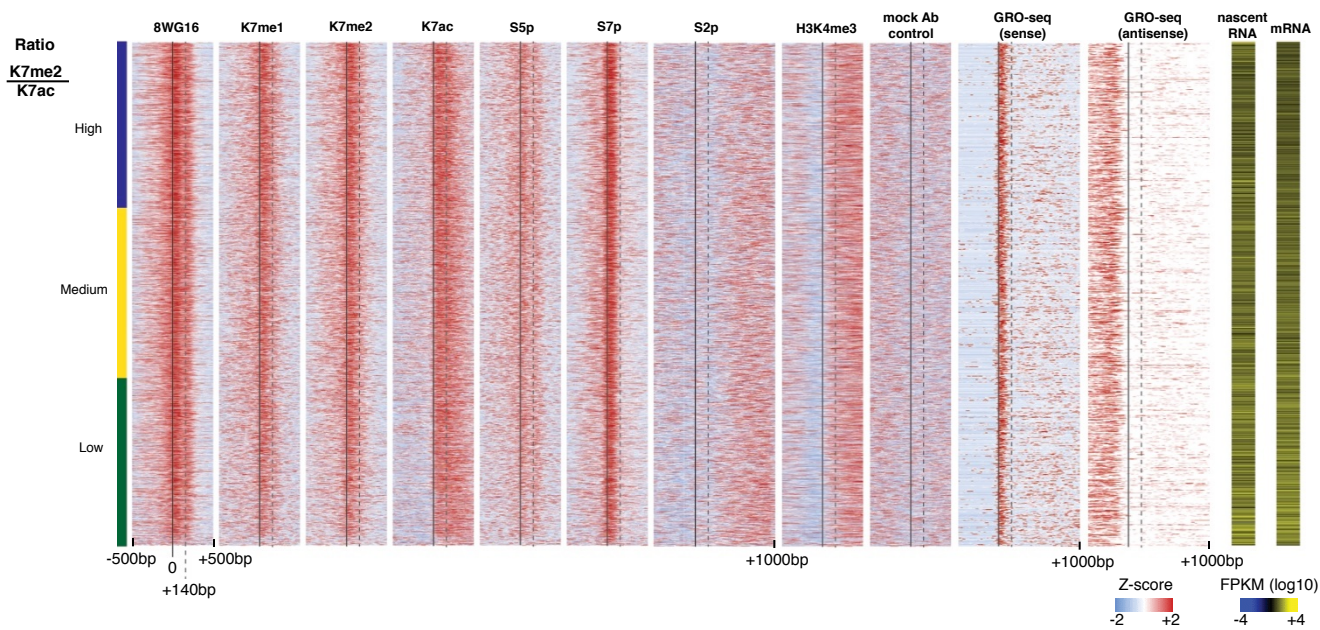

b

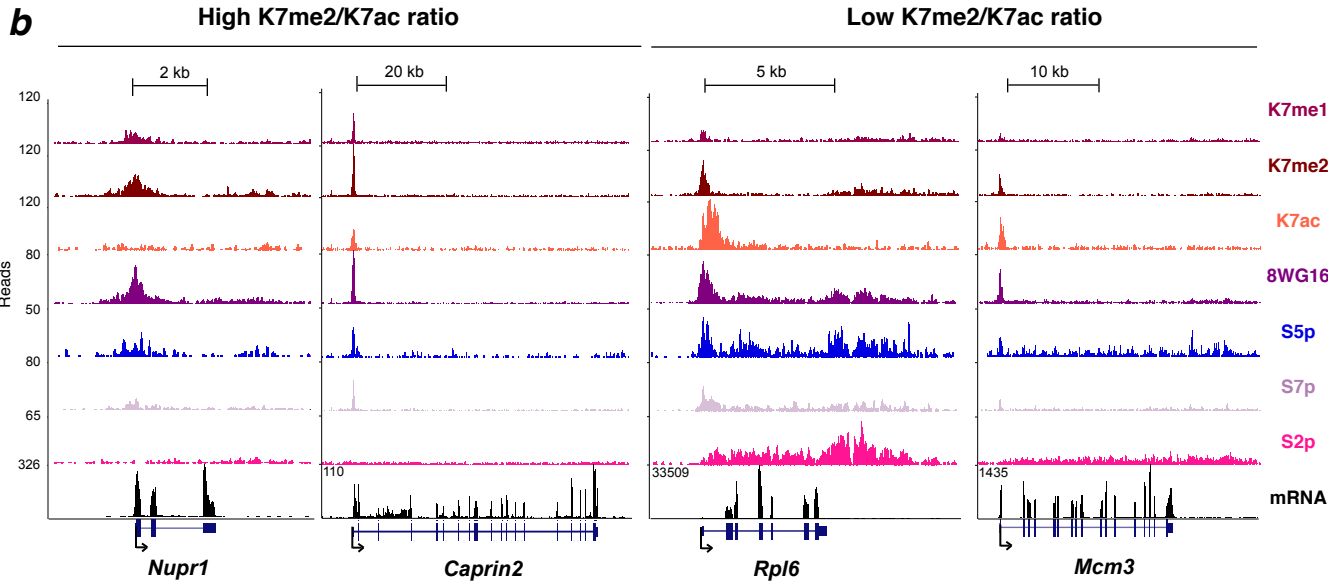

Supplement: supp [file elife-11215-supp-v1.zip]

Fig. 6 - figure supplement 1

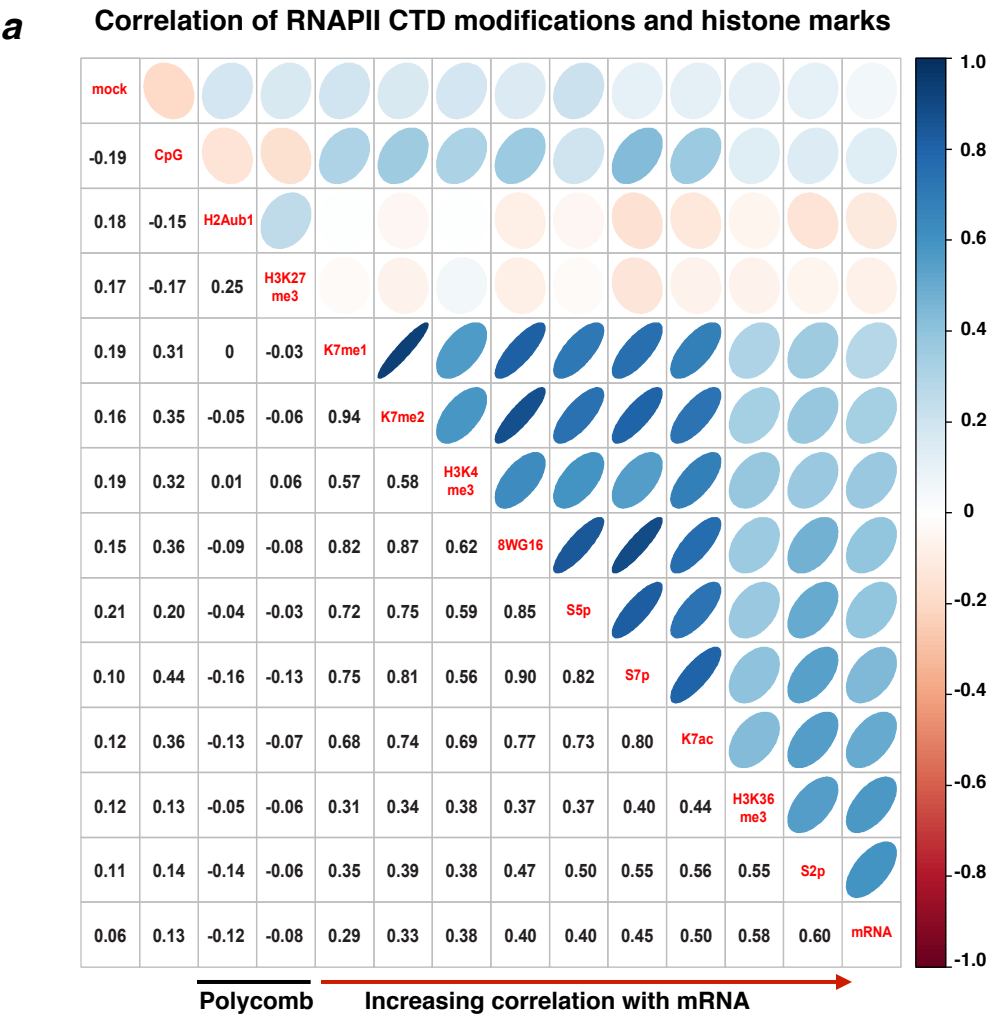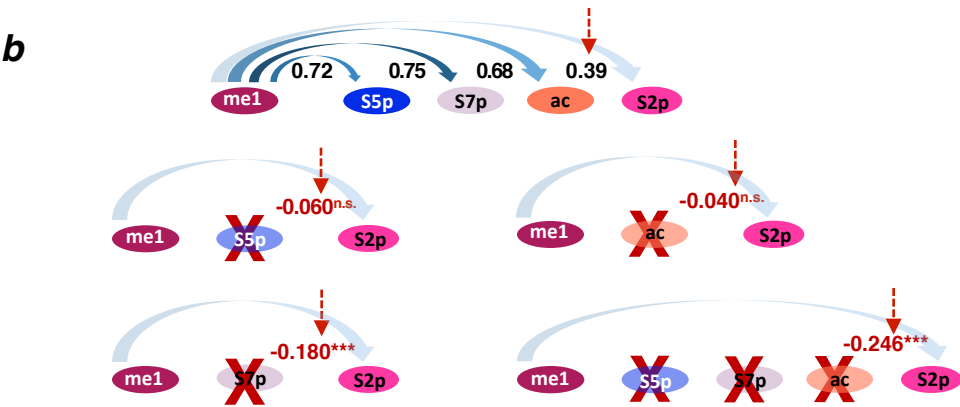

Supplement: supp [file elife-11215-supp-v1.zip]
